# Supplementary material for: Micro-RNAS Regulate Metabolic Syndrome-induced Senescence in Porcine Adipose Tissue-derived Mesenchymal Stem Cells through the P16/MAPK Pathway
Source: PubMed Central journal article supplement — Cell Transplant. 2018 Sep 6;27(10):1495–503. doi: 10.1177/0963689718795692 (PMC6180720; doi:10.1177/0963689718795692), 2018-09-06
Supplement: Table_S1.pdf [file Table_S1.pdf]

Table S1: Senescence-associated genes targeted by miRNAs in MetS-MSCs

|   | <b>Gene ID</b> | <b>Description</b>                   | <b>Function</b>                                                                                                                                             |
|---|----------------|--------------------------------------|-------------------------------------------------------------------------------------------------------------------------------------------------------------|
| 1 | ABL1           | ABL Proto-Oncogene 1                 | ABL deficiency shunts BMP signalling from Smad1/5/8 to Erk1/2, leading to p16 upregulation and osteoblast senescence.                                       |
| 2 | MAPK14         | Mitogen-Activated Protein Kinase 14  | One of the four p38 MAPKs that play an important role in the cascades of cellular responses evoked by extracellular stimuli.                                |
| 3 | CDKN1A         | Cyclin-Dependent Kinase Inhibitor 1A | Encodes protein P21, binds to and inhibits the activity of cyclin-cyclin-dependent kinase-2, thus functions as a regulator of cell cycle progression at G1. |
| 4 | CXCL1          | C-X-C Motif Chemokine Ligand 1       | The senescence-associated secretory phenotype (SASP) factor CXCL1 (also known as KC)                                                                        |
| 5 | IL1B           | Interleukin-1 Beta                   | A member of the interleukin-1 cytokine family, controls various cellular functions, including proliferation, differentiation and cell survival/apoptosis.   |
| 6 | CRP            | C-Reactive Protein                   | Displays several functions associated with host defense.                                                                                                    |
| 7 | HRAS           | GTP Binding Protein H-Ras            | GTPase HRas, also known as transforming protein p21. H-Ras activates Raf kinases like c-Raf, the next step in the MAPK/ERK pathway.                         |
| 8 | TERT           | Telomerase Reverse Transcriptase     | Playing a role in cellular senescence, as it is normally repressed in postnatal somatic cells resulting in progressive shortening of telomeres.             |

|    |        |                                        |                                                                                                                                                                              |
|----|--------|----------------------------------------|------------------------------------------------------------------------------------------------------------------------------------------------------------------------------|
| 9  | TBX3   | T-Box 3                                | T-Box 3 and T-Box 2 can bypass senescence by repressing ARF and p21                                                                                                          |
| 10 | FN1    | Fibronectin-1                          | Fibronectin is involved in cell adhesion and migration processes, including embryogenesis, wound healing, blood coagulation, host defense, and metastasis.                   |
| 11 | THBS1  | Thrombospondin-1                       | Thrombospondin-1 signaling through CD47 inhibits cell cycle progression and induces senescence in endothelial cells                                                          |
| 12 | COL1A1 | 23957394 Collagen Type I Alpha 1 Chain | The pro-alpha1 chains of type I collagen, whose triple helix comprises two alpha-1 chains and one alpha-2 chain. Resistance to collagen cleavage accelerates cellular aging. |
| 13 | COL3A1 | Collagen Type III Alpha 1 Chain        | Related to this gene are integrin and SMAD binding. An important paralogue is COL1A1.                                                                                        |
| 14 | IGF1R  | Insulin-Like Growth Factor 1 Receptor  | The major factor in the IGF-1/IGF-1R system, and exerts pleiotropic effects on cell growth, differentiation, development, and tissue repair.                                 |
| 15 | PCNA   | Cyclin                                 | The encoded protein acts as a homotrimer and helps increase the processivity of leading strand synthesis during DNA replication. In response to DNA damage                   |
| 16 | PIK3CA | PI3-Kinase Subunit Alpha               | Plays a key role by recruiting PH domain-containing proteins to the membrane, including AKT1 and PDK1, activating signaling cascades involved in cell growth and survival.   |
| 17 | CDKN1B | Cyclin-Dependent Kinase                | This gene encodes a cyclin-dependent kinase inhibitor, which shares a limited                                                                                                |

|    |         |                                              |                                                                                                                                                                                                                               |
|----|---------|----------------------------------------------|-------------------------------------------------------------------------------------------------------------------------------------------------------------------------------------------------------------------------------|
|    |         | Inhibitor 1B (P27, Kip1)                     | similarity with CDK inhibitor CDKN1A/p21.                                                                                                                                                                                     |
| 18 | IGF1    | Insulin Like Growth Factor 1                 | The major factor in the IGF-1/IGF-1R system a ligand for IGF1R. It initiates a cascade of down- stream signaling events leading to activation of the PI3K-AKT/PKB and the Ras-MAPK pathways.                                  |
| 19 | PTEN    | Phosphatase And Tensin Homolog               | Antagonizes the PI3K-AKT/PKB signaling pathway by dephosphorylating phosphoinositides and thereby modulating cell cycle progression and survival. The unphosphorylated form cooperates with AIP1 to suppress AKT1 activation. |
| 20 | PAPPA   | Pappalysin 1                                 | Encodes a secreted metalloproteinase that cleaves insulin-like growth factor binding proteins.                                                                                                                                |
| 21 | IGFBP4  | Insulin Like Growth Factor Binding Protein 4 | The protein binds both insulin-like growth factors (IGFs) I and II and circulates in the plasma in both glycosylated and non-glycosylated forms.                                                                              |
| 22 | SOD2    | Superoxide Dismutase 2                       | A member of the iron/manganese superoxide dismutase family. Among its related pathways are Apoptosis and survival.                                                                                                            |
| 23 | GADD45A | Growth Arrest And DNA Damage Inducible Alpha | Responds to environmental stresses by mediating activation of the p38/JNK pathway via MTK1/MEKK4 kinase.                                                                                                                      |
| 24 | VIM     | Vimentin                                     | Vimentin is attached to the nucleus, endoplasmic reticulum, and mitochondria, either laterally or terminally.                                                                                                                 |
| 25 | CCNA2   | Cyclin A2                                    | Binds and activates cyclin-dependent kinase-2 and promotes transition through                                                                                                                                                 |

|    |          |                                         |                                                                                                                                                                                             |
|----|----------|-----------------------------------------|---------------------------------------------------------------------------------------------------------------------------------------------------------------------------------------------|
|    |          |                                         | G1/S and G2/M.                                                                                                                                                                              |
| 26 | CDKN2B   | Cyclin Dependent Kinase<br>Inhibitor 2B | The encoded protein functions as a cell growth regulator that controls cell cycle G1 progression.                                                                                           |
| 27 | MAP2K6   | MAPK/ERK Kinase 6                       | As an essential component of p38 MAP-kinase mediated signal transduction pathway, this gene is involved in many cellular processes, such as stress-induced cell cycle arrest.               |
| 28 | SERPINE1 | Plasminogen Activator<br>Inhibitor-1    | Inducing senescence through activating p53-p21-Rb pathway                                                                                                                                   |
| 29 | TGFA     | Transforming Growth Factor<br>Alpha     | This gene encodes a growth factor that is a ligand for the epidermal growth factor receptor, which activates a signaling pathway for cell proliferation, differentiation, and development.  |
| 30 | CSF1     | Colony Stimulating Factor 1             | Plays an essential role in regulation of survival, proliferation and differentiation of hematopoietic precursor cells, especially mononuclear phagocytes, such as macrophages and monocytes |
| 31 | MAP2K1   | MAPK/ERK Kinase 1                       | Specificity protein kinase which acts as an essential component of the MAP kinase signal transduction pathway.                                                                              |
| 32 | ATM      | ATM Serine/Threonine<br>Kinase          | This gene belongs to the PI3/PI4-kinase family. This protein is an important cell cycle checkpoint kinase.                                                                                  |

|    |       |                                    |                                                                                                                                                                                  |
|----|-------|------------------------------------|----------------------------------------------------------------------------------------------------------------------------------------------------------------------------------|
| 33 | TERF2 | Telomeric Repeat Binding Factor 2  | Protein is present at telomeres in metaphase of the cell cycle, is a second negative regulator of telomere length, and plays a key role in the protective activity of telomeres. |
| 34 | CALR  | Calreticulin                       | Calcium-binding chaperone that promotes folding, oligomeric assembly, and quality control in the endoplasmic reticulum via the calreticulin/calnexin cycle.                      |
| 35 | CD44  | CD44 Molecule (Indian Blood Group) | As an essential component of Chk1/p53/CD44 cascades                                                                                                                              |
